# Supplementary material for: Higher Nocturnal Blood Pressure and Blunted Nocturnal Dipping Are Associated With Decreased Daytime Urinary Sodium and Potassium Excretion in Patients With CKD
Source: PubMed Central journal article supplement — Kidney Int Rep. 2023 Oct 21;9(1):73–86. doi: 10.1016/j.ekir.2023.10.017 (PMC10831351; doi:10.1016/j.ekir.2023.10.017), 2023-10-21
Supplement: mmc1.pdf [file mmc1.pdf]

## Higher Nocturnal Blood Pressure and Blunted Nocturnal Dipping Are Associated with Decreased Daytime Urinary Sodium and Potassium Excretion in CKD Patients

### Supplemental Material

#### Strobe Statement.

**Table S1.** BP, PR, PP, and nocturnal dipping, by quartiles of day : night ratio of urinary sodium and potassium excretion rate.

**Table S2.** Characteristics of patients with CKD according to quartiles of 24-hour urinary excretion of sodium and potassium.

**Table S3.** Nighttime and daytime BP values and dipping proportion according to 24h urinary sodium and potassium excretion categories and day : night ratio of the urinary sodium and potassium excretion status.

**Table S4.** Multivariate logistic regression analysis for nocturnal SBP according to day : night ratio of urinary sodium and potassium excretion rate categories among CKD patients.

#### STROBE Statement—Checklist of items that should be included in reports of *cross-sectional studies*

|                           | Item No | Recommendation                                                                                      | Page No |
|---------------------------|---------|-----------------------------------------------------------------------------------------------------|---------|
| <b>Title and abstract</b> | 1       | (a) Indicate the study's design with a commonly used term in the title or the abstract              | 1-2     |
|                           |         | (b) Provide in the abstract an informative and balanced summary of what was done and what was found | 1-2     |
| <b>Introduction</b>       |         |                                                                                                     |         |
| Background/rationale      | 2       | Explain the scientific background and rationale for the investigation being reported                | 2       |

|                              |    |                                                                                                                                                                                      |                    |
|------------------------------|----|--------------------------------------------------------------------------------------------------------------------------------------------------------------------------------------|--------------------|
| Objectives                   | 3  | State specific objectives, including any prespecified hypotheses                                                                                                                     | 3                  |
| <b>Methods</b>               |    |                                                                                                                                                                                      |                    |
| Study design                 | 4  | Present key elements of study design early in the paper                                                                                                                              | 3                  |
| Setting                      | 5  | Describe the setting, locations, and relevant dates, including periods of recruitment, exposure, follow-up, and data collection                                                      | 3                  |
| Participants                 | 6  | (a) Give the eligibility criteria, and the sources and methods of selection of participants                                                                                          | 3                  |
| Variables                    | 7  | Clearly define all outcomes, exposures, predictors, potential confounders, and effect modifiers. Give diagnostic criteria, if applicable                                             | 3-4                |
| Data sources/<br>measurement | 8  | For each variable of interest, give sources of data and details of methods of assessment (measurement). Describe comparability of assessment methods if there is more than one group | 3-4                |
| Bias                         | 9  | Describe any efforts to address potential sources of bias                                                                                                                            | 4                  |
| Study size                   | 10 | Explain how the study size was arrived at                                                                                                                                            | 3                  |
| Quantitative variables       | 11 | Explain how quantitative variables were handled in the analyses. If applicable, describe which groupings were chosen and why                                                         | 3-4                |
| Statistical methods          | 12 | (a) Describe all statistical methods, including those used to control for confounding                                                                                                | 4                  |
|                              |    | (b) Describe any methods used to examine subgroups and interactions                                                                                                                  | 4                  |
|                              |    | (c) Explain how missing data were addressed                                                                                                                                          | Tables 1, Tables 3 |

|                  |    |                                                                                                                                                                                                              |                          |
|------------------|----|--------------------------------------------------------------------------------------------------------------------------------------------------------------------------------------------------------------|--------------------------|
|                  |    | (d) If applicable, describe analytical methods taking account of sampling strategy                                                                                                                           | 4                        |
|                  |    | (e) Describe any sensitivity analyses                                                                                                                                                                        | -                        |
| <b>Results</b>   |    |                                                                                                                                                                                                              |                          |
| Participants     | 13 | (a) Report numbers of individuals at each stage of study—eg numbers potentially eligible, examined for eligibility, confirmed eligible, included in the study, completing follow-up, and analysed            | 3                        |
|                  |    | (b) Give reasons for non-participation at each stage                                                                                                                                                         | 3                        |
|                  |    | (c) Consider use of a flow diagram                                                                                                                                                                           | -                        |
| Descriptive data | 14 | (a) Give characteristics of study participants (eg demographic, clinical, social) and information on exposures and potential confounders                                                                     | 5, Table1                |
|                  |    | (b) Indicate number of participants with missing data for each variable of interest                                                                                                                          | Table 1, Tables 3        |
| Outcome data     | 15 | Report numbers of outcome events or summary measures                                                                                                                                                         | Table 1, Table 2 Table 4 |
| Main results     | 16 | (a) Give unadjusted estimates and, if applicable, confounder-adjusted estimates and their precision (eg, 95% confidence interval). Make clear which confounders were adjusted for and why they were included | Table 3, Table S4        |
|                  |    | (b) Report category boundaries when continuous variables were categorized                                                                                                                                    | 3-4                      |
|                  |    | (c) If relevant, consider translating estimates of relative risk into absolute risk for a meaningful time period                                                                                             | Table 3                  |

|                          |    |                                                                                                                                                                            |                      |
|--------------------------|----|----------------------------------------------------------------------------------------------------------------------------------------------------------------------------|----------------------|
| Other analyses           | 17 | Report other analyses done—eg analyses of subgroups and interactions, and sensitivity analyses                                                                             | 4, Table 2, Table S3 |
| <b>Discussion</b>        |    |                                                                                                                                                                            |                      |
| Key results              | 18 | Summarise key results with reference to study objectives                                                                                                                   | 7                    |
| Limitations              | 19 | Discuss limitations of the study, taking into account sources of potential bias or imprecision. Discuss both direction and magnitude of any potential bias                 | 9                    |
| Interpretation           | 20 | Give a cautious overall interpretation of results considering objectives, limitations, multiplicity of analyses, results from similar studies, and other relevant evidence | 7-9                  |
| Generalisability         | 21 | Discuss the generalisability (external validity) of the study results                                                                                                      | 9                    |
| <b>Other information</b> |    |                                                                                                                                                                            |                      |
| Funding                  | 22 | Give the source of funding and the role of the funders for the present study and, if applicable, for the original study on which the present article is based              | -                    |

**Table S1. BP, PR, PP, and nocturnal dipping, by quartiles of day : night ratio of urinary sodium and potassium excretion rate**

| Variable                      | Day : night ratio of the urinary sodium excretion rate |                           |                           |                           |                | Day : night ratio of the urinary potassium excretion rate |                           |                           |                           |                |
|-------------------------------|--------------------------------------------------------|---------------------------|---------------------------|---------------------------|----------------|-----------------------------------------------------------|---------------------------|---------------------------|---------------------------|----------------|
|                               | Q1                                                     | Q2                        | Q3                        | Q4                        | <i>P Value</i> | Q1                                                        | Q2                        | Q3                        | Q4                        | <i>P Value</i> |
|                               | ≤1.00 (n=788)                                          | 1.01-1.52 (n=788)         | 1.53-2.52 (n=788)         | >2.52 (n=788)             |                | ≤ 1.44 (n=788)                                            | 1.44-1.94 (n=788)         | 1.95-2.62 (n=787)         | >2.62 (n=789)             |                |
| Daytime SBP (mmHg)            | 127.00<br>(118.00-139.00)                              | 125.00<br>(115.00-135.00) | 121.00<br>(112.00-131.00) | 119.00<br>(110.00-128.00) | < 0.001        | 126.00<br>(116.00-138.00)                                 | 124.00<br>(115.00-135.00) | 122.00<br>(114.00-133.00) | 119.00<br>(110.00-128.00) | < 0.001        |
| Daytime DBP (mmHg)            | 84.00<br>(76.00-92.00)                                 | 83.00<br>(75.00-90.00)    | 80.00 (73.00-88.00)       | 78.00<br>(71.00-85.00)    | < 0.001        | 83.00<br>(75.00-91.00)                                    | 82.00<br>(74.00-89.00)    | 81.00 (74.00-89.00)       | 78.00<br>(71.00-85.00)    | < 0.001        |
| Daytime PR (bpm)              | 76.00<br>(70.00-82.00)                                 | 74.50<br>(69.00-82.00)    | 75.00 (69.00-81.00)       | 76.00<br>(70.00-83.00)    | 0.044          | 76.00<br>(70.00-83.00)                                    | 75.00<br>(70.00-83.00)    | 75.00 (69.00-82.00)       | 74.00<br>(68.00-81.00)    | 0.002          |
| Daytime PP (mmHg)             | 43.00<br>(37.00-50.00)                                 | 41.00<br>(37.00-47.00)    | 40.00 (36.00-47.00)       | 40.00<br>(36.00-46.00)    | < 0.001        | 42.00<br>(37.00-49.00)                                    | 42.00<br>(36.00-48.00)    | 41.00 (36.00-47.00)       | 40.00<br>(36.00-46.00)    | < 0.001        |
| Nighttime SBP (mmHg)          | 124.00<br>(114.00-138.00)                              | 120.00<br>(110.00-132.00) | 115.00<br>(106.00-127.00) | 112.00<br>(103.00-122.00) | < 0.001        | 122.00<br>(111.00-137.00)                                 | 119.00<br>(109.00-133.00) | 117.00<br>(107.00-129.00) | 113.00<br>(103.00-123.00) | < 0.001        |
| Nighttime DBP (mmHg)          | 80.00<br>(73.00-89.00)                                 | 78.00<br>(71.00-86.00)    | 74.00 (67.00-84.00)       | 71.50<br>(64.00-79.00)    | < 0.001        | 79.00<br>(71.00-87.00)                                    | 77 (70-86)                | 76.00 (68.00-84.00)       | 72.00<br>(65.00-72.00)    | < 0.001        |
| Nighttime PR (bpm)            | 67.00<br>(60.00-74.00)                                 | 65.00<br>(60.00-72.00)    | 64.00 (58.00-70.00)       | 64.00<br>(59.00-70.00)    | < 0.001        | 67.00<br>(61.00-75.00)                                    | 66 (60-72.75)             | 64 (59-71)                | 63.00<br>(58.00-69.00)    | < 0.001        |
| Nighttime PP (mmHg)           | 43.00<br>(37.00-51.00)                                 | 41.00<br>(36.00-48.00)    | 40.00 (36.00-47.00)       | 40.00<br>(35.00-45.00)    | < 0.001        | 42.00<br>(37.00-50.00)                                    | 41.50<br>(36.00-49.00)    | 41.00 (36.00-47.00)       | 40.00<br>(35.00-46.00)    | < 0.001        |
| Dipping SBP (mmHg) (% of day) | -2.42<br>(-6.54-2.66)                                  | -3.59<br>(-7.69-0.74)     | -4.33 (-8.86-0.00)        | -5.42<br>(-9.40--1.59)    | < 0.001        | -3.32<br>(-7.44-1.32)                                     | -3.49 (-8.03-0.72)        | -4.08 (-8-0)              | -4.88 (-8.74-0.87)        | < 0.001        |
| Dipping DBP (mmHg)            | -4.05                                                  | -5.33 (-10-0)             | -6.25 (-11.84--1.227)     | -7.80                     | < 0.001        | -4.65 (-9.72-0)                                           | -5.56 (-10.51-            | -5.98 (-11.39--1.15)      | -6.90 (-12.22-            | < 0.001        |

|                      |                |                |                       |                |         |                 |                |                 |                 |         |
|----------------------|----------------|----------------|-----------------------|----------------|---------|-----------------|----------------|-----------------|-----------------|---------|
| (% of day)           | (-8.82-1.28)   |                |                       | (-12.87--2.82) |         |                 |                | -1.08)          |                 | -2.15)  |
| Dipping PR (bpm) (%) | -10.98         | -12.5          | -13.70 (-18.31--9.19) | -14.69         | < 0.001 | -11.43 (-16.44- | -12.5 (-17.13- | -13.70 (-18.47- | -14.71 (-19.23- | < 0.001 |
| of day)              | (-16.18--6.02) | (-16.90--8.20) |                       | (-20--9.52)    |         | -6.25)          | -7.14)         | -9.07)          | -10)            |         |
| Dipping PP (mmHg)    | 1.69 (-6-9.68) | 0 (-6.82-6.67) | 0 (-6.98-5.56)        | 0 (-7.19-6.08) | < 0.001 | 0 (-7.14-7.84)  | 0 (-6.63-6.82) | 0 (-6.25-6.67)  | 0 (-7.41-6.67)  |         |
| (% of day)           |                |                |                       |                |         |                 |                |                 |                 | 0.842   |

BP, blood pressure; bpm, beats per minute; DBP, diastolic blood pressure; PP, pulse pressure; PR, pulse rate; SBP, systolic blood pressure.

**Table S2. Characteristics of patients with CKD according to quartiles of 24-hour urinary excretion of sodium and potassium**

| Variable                                 | Urinary Sodium Excretion (mmol/24h) |                           |                            |                       | Urinary Potassium Excretion (mmol/24 h) |                          |                          |                        |
|------------------------------------------|-------------------------------------|---------------------------|----------------------------|-----------------------|-----------------------------------------|--------------------------|--------------------------|------------------------|
|                                          | Q1                                  | Q2                        | Q3                         | Q4                    | Q1                                      | Q2                       | Q3                       | Q4                     |
|                                          | ≤ 83.66<br>(n = 788)                | 83.67-123.14<br>(n = 788) | 123.15-172.26<br>(n = 788) | ≥ 172.27<br>(n = 788) | ≤ 24.57<br>(n = 788)                    | 24.58-32.20<br>(n = 788) | 32.21-41.65<br>(n = 788) | ≥ 41.66<br>(n = 788)   |
| Age (years)                              | 47.38±16.10                         | 48.13±14.41               | 47.99±14.01                | 47.02±13.85           | 47.04±15.92                             | 48.05±14.37              | 47.10±14.15              | 48.32±13.92            |
| ≥ 60 years (%)                           | 26.90                               | 25.63                     | 22.21                      | 19.54                 | 26.02                                   | 24.87                    | 21.19                    | 22.21                  |
| Men (%)                                  | 51.90                               | 53.05                     | 55.33                      | 66.88                 | 49.62                                   | 51.40                    | 58.88                    | 67.13                  |
| <b>Risk factors</b>                      |                                     |                           |                            |                       |                                         |                          |                          |                        |
| BMI (kg/m <sup>2</sup> )                 | 22.7<br>(20.46-25.72)               | 23.46 (20.94-25.79)       | 24.05<br>(21.60-26.34)     | 24.98 (22.77-27.77)   | 22.68<br>(20.28-25.36)                  | 23.65 (21.37-26.08)      | 24.20<br>(21.67-26.46)   | 25.07<br>(22.48-27.87) |
| Obesity (BMI ≥ 30<br>kg/m <sup>2</sup> ) | 4.95                                | 6.60                      | 6.35                       | 12.06                 | 4.44                                    | 5.96                     | 7.49                     | 12.06                  |
| Diabetes mellitus (%)                    | 20.18                               | 17.64                     | 21.95                      | 26.90                 | 18.27                                   | 20.69                    | 19.54                    | 28.17                  |
| Dyslipidemia (%)                         | 93.78                               | 90.36                     | 90.48                      | 94.29                 | 92.01                                   | 91.37                    | 92.89                    | 92.64                  |
| Cardiovascular                           | 15.10                               | 12.94                     | 13.96                      | 15.36                 | 13.45                                   | 15.61                    | 13.45                    | 14.85                  |

disease (%)

|                                 |       |       |       |       |       |       |       |       |
|---------------------------------|-------|-------|-------|-------|-------|-------|-------|-------|
| Antihypertensive medication (%) | 64.72 | 65.61 | 65.74 | 70.94 | 63.96 | 67.64 | 67.01 | 68.40 |
|---------------------------------|-------|-------|-------|-------|-------|-------|-------|-------|

|                               |      |      |      |      |      |      |       |      |
|-------------------------------|------|------|------|------|------|------|-------|------|
| Immunosuppressive agents* (%) | 8.76 | 8.25 | 8.76 | 7.23 | 6.60 | 7.36 | 10.41 | 8.63 |
|-------------------------------|------|------|------|------|------|------|-------|------|

|                     |      |      |      |      |      |      |      |      |
|---------------------|------|------|------|------|------|------|------|------|
| Current smoking (%) | 2.92 | 2.03 | 2.92 | 3.93 | 3.17 | 2.79 | 2.79 | 3.05 |
|---------------------|------|------|------|------|------|------|------|------|

**BP**

|                   |                           |                           |                           |                           |                           |                           |                           |                           |
|-------------------|---------------------------|---------------------------|---------------------------|---------------------------|---------------------------|---------------------------|---------------------------|---------------------------|
| Office SBP (mmHg) | 130.00<br>(115.00-146.00) | 131.00<br>(117.00-149.00) | 131.00<br>(119.00-147.00) | 133.00<br>(119.00-148.00) | 131.00<br>(115.25-148.00) | 132.00<br>(119.00-149.00) | 131.00<br>(118.00-147.00) | 131.00<br>(118.00-146.00) |
|-------------------|---------------------------|---------------------------|---------------------------|---------------------------|---------------------------|---------------------------|---------------------------|---------------------------|

|                   |                        |                     |                        |                     |                        |                     |                        |                        |
|-------------------|------------------------|---------------------|------------------------|---------------------|------------------------|---------------------|------------------------|------------------------|
| Office DBP (mmHg) | 83.00<br>(75.00-93.00) | 84.00 (75.00-93.00) | 84.00<br>(75.00-93.00) | 84.00 (76.00-95.00) | 83.00<br>(74.00-93.00) | 84.00 (77.00-93.75) | 84.00<br>(76.00-93.00) | 83.00<br>(76.00-93.00) |
|-------------------|------------------------|---------------------|------------------------|---------------------|------------------------|---------------------|------------------------|------------------------|

|                 |                           |                           |                           |                           |                           |                           |                           |                           |
|-----------------|---------------------------|---------------------------|---------------------------|---------------------------|---------------------------|---------------------------|---------------------------|---------------------------|
| 24-h SBP (mmHg) | 120.00<br>(112.00-132.00) | 120.00<br>(111.00-131.00) | 122.00<br>(113.00-133.00) | 124.00<br>(114.00-135.00) | 120.00<br>(112.00-132.00) | 122.00<br>(113.00-132.00) | 122.00<br>(112.00-132.00) | 122.00<br>(113.00-133.75) |
|-----------------|---------------------------|---------------------------|---------------------------|---------------------------|---------------------------|---------------------------|---------------------------|---------------------------|

|                 |                        |                     |                        |                     |                        |                     |                        |                        |
|-----------------|------------------------|---------------------|------------------------|---------------------|------------------------|---------------------|------------------------|------------------------|
| 24-h DBP (mmHg) | 78.00<br>(71.00-87.00) | 79.00 (72.00-87.00) | 80.50<br>(73.00-88.00) | 82.00 (74.00-89.00) | 78.00<br>(71.00-87.00) | 80.00 (72.00-88.00) | 80.50<br>(72.25-88.00) | 80.00<br>(73.00-88.00) |
|-----------------|------------------------|---------------------|------------------------|---------------------|------------------------|---------------------|------------------------|------------------------|

|                    |                           |                           |                           |                           |                           |                           |                           |                           |
|--------------------|---------------------------|---------------------------|---------------------------|---------------------------|---------------------------|---------------------------|---------------------------|---------------------------|
| Daytime SBP (mmHg) | 122.00<br>(113.00-133.00) | 121.00<br>(112.00-132.00) | 124.00<br>(114.00-133.00) | 125.00<br>(115.00-137.00) | 121.00<br>(113.00-134.00) | 123.50<br>(114.00-133.00) | 123.00<br>(113.00-133.00) | 124.00<br>(114.00-134.75) |
|--------------------|---------------------------|---------------------------|---------------------------|---------------------------|---------------------------|---------------------------|---------------------------|---------------------------|

|                    |                        |                     |                        |                     |                        |                     |                        |                        |
|--------------------|------------------------|---------------------|------------------------|---------------------|------------------------|---------------------|------------------------|------------------------|
| Daytime DBP (mmHg) | 80.00<br>(73.00-88.00) | 80.00 (72.25-88.00) | 82.00<br>(74.00-89.00) | 83.00 (76.00-90.00) | 80.00<br>(72.00-89.00) | 81.00 (73.25-89.00) | 82.00<br>(74.00-89.00) | 82.00<br>(74.00-89.00) |
|--------------------|------------------------|---------------------|------------------------|---------------------|------------------------|---------------------|------------------------|------------------------|

|                   |                        |                     |                        |                     |               |                     |                        |                        |
|-------------------|------------------------|---------------------|------------------------|---------------------|---------------|---------------------|------------------------|------------------------|
| Daytime PP (mmHg) | 76.00<br>(70.00-83.00) | 74.00 (68.00-81.00) | 75.00<br>(69.00-82.00) | 75.50 (70.00-82.00) | 75.50 (69-82) | 75.00 (69.00-82.00) | 76.00<br>(70.00-82.00) | 75.00<br>(69.00-82.00) |
|-------------------|------------------------|---------------------|------------------------|---------------------|---------------|---------------------|------------------------|------------------------|

|                      |                           |                           |                           |                           |                           |                           |                           |                           |
|----------------------|---------------------------|---------------------------|---------------------------|---------------------------|---------------------------|---------------------------|---------------------------|---------------------------|
| Nighttime SBP (mmHg) | 116.50<br>(107.00-130.00) | 116.00<br>(105.00-128.00) | 118.00<br>(107.00-131.00) | 119.00<br>(110.00-132.00) | 116.00<br>(106.00-130.00) | 118.00<br>(108.00-130.00) | 118.00<br>(107.00-130.00) | 118.00<br>(108.00-131.00) |
|----------------------|---------------------------|---------------------------|---------------------------|---------------------------|---------------------------|---------------------------|---------------------------|---------------------------|

0)

|                                  |                       |                        |                        |                        |                        |                        |                        |                        |
|----------------------------------|-----------------------|------------------------|------------------------|------------------------|------------------------|------------------------|------------------------|------------------------|
| Nighttime DBP (mmHg)             | 75.00 (68.00-83.00)   | 75.00 (67.00-84.00)    | 77.00 (68.25-86.00)    | 78.00 (70.00-86.00)    | 75.00 (68.00-84.00)    | 77.00 (68.00-85.00)    | 76.00 (68.00-85.00)    | 77.00 (69.00-85.00)    |
| Nighttime PP (mmHg)              | 66.00 (60.00-73.00)   | 64.00 (58.00-70.00)    | 65.00 (59.00-72.00)    | 66.00 (60.00-72.00)    | 66.00 (60.00-73.00)    | 65.00 (60.00-72.00)    | 65.00 (59.00-71.00)    | 65.00 (59.00-71.00)    |
| Dipping SBP (mmHg) (% of day)    | -3.66 (-8.06-0.72)    | -4.55 (-8.33- -0)      | -3.78 (-7.96-0)        | -3.98 (-8.07- 0)       | -3.92 (-7.99- 0)       | -3.46 (-8.06-0.68)     | -4.40 (-8.20-0)        | -4.13 (-8.06-0)        |
| Dipping DBP (mmHg) (% of day)    | -6.02 (-11.36- 0)     | -6.16 (-11.24- 1.14)   | -5.13 (-10.60- -1.10)  | -5.62 (-10.65- -1.08)  | -5.53 (-11.00- -1.11)  | -5.56 (-10.39- -0.96)  | -6.15 (-11.69- -1.08)  | -5.62 (-10.81- -1.10)  |
| Dipping PP (mmHg) (% of day)     | -12.5 (-17.86- -7.14) | -18.75 (-13.58- -8.83) | -12.90 (-17.81- -8.20) | -12.82 (-17.20- -8.12) | -11.95 (-17.53- -6.37) | -12.82 (-17.65- -8.07) | -13.58 (-18.30- -9.04) | -13.41 (-18.08- -8.45) |
| Office BP < 140/90 mmHg (%)      | 57.11                 | 53.68                  | 53.43                  | 52.79                  | 54.82                  | 51.90                  | 54.44                  | 55.84                  |
| 24-h ABPM < 130/80 mmHg (%)      | 50.00                 | 48.98                  | 43.27                  | 38.58                  | 49.37                  | 44.92                  | 43.15                  | 43.40                  |
| Daytime ABPM < 135/85 mmHg (%)   | 62.18                 | 63.07                  | 55.71                  | 51.65                  | 61.42                  | 56.85                  | 58.38                  | 55.96                  |
| Nighttime ABPM < 120/70 mmHg (%) | 28.555                | 31.22                  | 26.40                  | 23.86                  | 28.68                  | 27.03                  | 28.30                  | 26.02                  |
| <b>Circadian profile</b>         |                       |                        |                        |                        |                        |                        |                        |                        |
| <b>SBP</b>                       |                       |                        |                        |                        |                        |                        |                        |                        |
| Dipper (%)                       | 16.75                 | 17.51                  | 15.86                  | 15.10                  | 16.37                  | 16.37                  | 16.12                  | 16.37                  |
| Nondipper (%)                    | 54.82                 | 58.88                  | 57.36                  | 58.01                  | 57.74                  | 56.22                  | 57.36                  | 58.76                  |
| Riser (%)                        | 28.17                 | 23.48                  | 26.65                  | 25.38                  | 25.76                  | 27.28                  | 26.14                  | 24.49                  |
| <b>DBP</b>                       |                       |                        |                        |                        |                        |                        |                        |                        |
| Dipper (%)                       | 30.20                 | 31.22                  | 26.78                  | 28.68                  | 28.55                  | 27.79                  | 31.35                  | 29.19                  |

|                                                    |                        |                          |                        |                        |                       |                       |                        |                        |
|----------------------------------------------------|------------------------|--------------------------|------------------------|------------------------|-----------------------|-----------------------|------------------------|------------------------|
| Nondipper (%)                                      | 46.19                  | 48.22                    | 52.66                  | 50.00                  | 49.37                 | 50.63                 | 47.21                  | 49.87                  |
| Riser (%)                                          | 23.22                  | 20.56                    | 20.43                  | 20.81                  | 22.08                 | 21.45                 | 20.94                  | 20.56                  |
| eGFR by CKD-EPI †<br>(mL/min/1.73 m <sup>2</sup> ) | 65.00 (30.03-100.00)   | 65.00 (34.25-101.00)     | 66.00 (33.00-99.00)    | 74.00 (41.00-102.50)   | 63.48 (26.51-103.00)  | 62.00 (31.00-100.00)  | 70.00 (39.79-100.00)   | 72.00 (40.02-100.00)   |
| eGFR by CKD-EPI < 60 (mL/min/1.73 m <sup>2</sup> ) | 45.69                  | 43.78                    | 45.30                  | 38.96                  | 46.32                 | 47.21                 | 40.86                  | 39.3 4                 |
| Fasting blood glucose (mmol/L)                     | 4.72 (4.22-5.40)       | 4.8 (4.3- 5.33)          | 4.8 (4.3-5.4)          | 4.89 (4.4-5.61)        | 4.70 (4.24-5.30)      | 4.70 (4.30-5.40)      | 4.80 (4.30-5.50)       | 4.90 (4.39-5.70)       |
| 24 h V (L)                                         | 1.3 (0.89-1.82)        | 1.69 (1.31-2.11)         | 1.86 (1.51-2.32)       | 2.28 (1.81-2.79)       | 1.41 (0.97-1.88)      | 1.68 (1.29-2.19)      | 1.90 (1.49-2.39)       | 2.23 (1.74-2.74)       |
| Na excretion (mmol/24 h)                           | 59.38 (41.48-71.53)    | 104.90 (94.36-114.12)    | 145.42 (133.04-157.69) | 214.18 (190.91-254.76) | 84.95 (53.63-123.04)  | 116.70 (83.35-154.02) | 133.95 (98.97-183.81)  | 164.76 (119.14-220.29) |
| K excretion (mmol/24 h)                            | 25.05 (18.25-32.63)    | 30.55 (24.19-38.72)      | 33.29 (26.62-42.32)    | 40.25 (32.42-52.14)    | 19.50 (15.77-22.29)   | 28.46 (26.72-30.46)   | 36.32 (34.06-38.56)    | 50.39 (45.39-58.89)    |
| Plasma Na (mmol/L)                                 | 140.00 (138.00-142.00) | 141.00 (139.00-142.4.00) | 141.00 (139.00-142.80) | 141.00 (139.00-143.00) | 140.90 (139.0-142.30) | 141.00 (139-142.73)   | 141.00 (139.00-142.10) | 141.00 (139.00-142.70) |
| Plasma K (mmol/L)                                  | 3.90 (3.60-4.20)       | 3.88 (3.60-4.15)         | 3.81 (3.58-4.14)       | 3.80 (3.55-4.12)       | 3.80 (3.50-4.16)      | 3.88 (3.60-4.14)      | 3.82 (3.60-4.19)       | 3.90 (3.63-4.20)       |
| <b>Albuminuria category (%)</b>                    |                        |                          |                        |                        |                       |                       |                        |                        |
| A1 (normal to mildly increased)                    | 16.12                  | 20.94                    | 20.43                  | 21.57                  | 17.13                 | 17.77                 | 21.19                  | 22.97                  |
| A2 (moderately increased)                          | 22.84                  | 25.00                    | 27.28                  | 22.84                  | 24.62                 | 27.03                 | 22.34                  | 23.98                  |

A3 (severely increased) 61.04 54.06 52.28 55.46 58.25 55.20 56.47 52.92

Results are medians (interquartile range) or percentage unless otherwise specified. ABPM, ambulatory blood pressure monitoring; BP, blood pressure; BMI, body mass index; DBP, diastolic blood pressure; eGFR, estimated glomerular filtration rate; Na, sodium; K, potassium; SBP, systolic blood pressure.

\*Any exposure to glucocorticoids or immunosuppressive agents within 12 weeks.

†GFR was evaluated using EPI equation.

**Table S3. Nighttime and daytime BP values and dipping proportion according to 24h urinary sodium and potassium excretion categories and day : night ratio of the urinary sodium and potassium excretion status**

|                    | Day : night ratio of the urinary sodium excretion |                           |                           |                           |           |                                       |                           |                           |                           |        | Day : night ratio of the urinary potassium excretion |                           |                           |                           |        |                                         |                           |                           |                           |        |
|--------------------|---------------------------------------------------|---------------------------|---------------------------|---------------------------|-----------|---------------------------------------|---------------------------|---------------------------|---------------------------|--------|------------------------------------------------------|---------------------------|---------------------------|---------------------------|--------|-----------------------------------------|---------------------------|---------------------------|---------------------------|--------|
|                    | 24h urinary sodium excretion ≤ 123.14             |                           |                           |                           |           | 24h urinary sodium excretion > 123.14 |                           |                           |                           |        | 24h urinary potassium excretion ≤ 32.20              |                           |                           |                           |        | 24h urinary potassium excretion > 32.20 |                           |                           |                           |        |
|                    | Q1                                                | Q2                        | Q3                        | Q4                        | P         | Q1                                    | Q2                        | Q3                        | Q4                        | P      | Q1                                                   | Q2                        | Q3                        | Q4                        | P      | Q1                                      | Q2                        | Q3                        | Q4                        | P      |
| n (%)              | 402<br>(25.51<br>)                                | 382<br>(24.24<br>)        | 373<br>(23.67<br>)        | 419<br>(26.59<br>)        | Val<br>ue | 386<br>(24.49<br>)                    | 406<br>(25.76<br>)        | 415<br>(26.33<br>)        | 369<br>(23.41<br>)        | Value  | 458<br>(29.06<br>)                                   | 407<br>(25.82<br>)        | 364<br>(23.10<br>)        | 347<br>(22.02<br>)        | Value  | 330<br>(20.94<br>)                      | 381<br>(24.18<br>)        | 423<br>(26.84<br>)        | (28.05)                   | Value  |
| Nighttime SBP mmHg | 122.50<br>(112.00-138.00)                         | 118.00<br>(105.00-130.00) | 114.00<br>(103.00-121.00) | 111.00<br>(103.00-121.00) | <0.001    | 125.50<br>(116.00-140.00)             | 121.00<br>(112.00-133.00) | 116.00<br>(106.00-128.00) | 112.00<br>(102.00-123.00) | <0.001 | 120.00<br>(109.00-136.00)                            | 119.00<br>(109.00-131.00) | 116.00<br>(107.00-122.00) | 112.00<br>(103.00-122.00) | <0.001 | 123.00<br>(112.00-138.00)               | 120.00<br>(109.00-134.00) | 117.00<br>(107.00-128.00) | 114.00<br>(104.00-124.00) | <0.001 |

|             |        |      |      |      |     |        |        |        |            |       |            |         |        |        |       |         |          |         |            |       |
|-------------|--------|------|------|------|-----|--------|--------|--------|------------|-------|------------|---------|--------|--------|-------|---------|----------|---------|------------|-------|
|             | )      |      |      |      |     |        |        |        |            |       |            |         |        |        |       |         |          |         |            |       |
| Nighttime   | 79.00  | 76.0 | 73.  | 71.0 | <0. | 82     | 80     | 76     | 72         | <0.00 | 78.50      | 76.00   | 75.0   | 71.00  | <0.00 | 81.00   | 77.00    | 77.00   | 73.00      | <0.00 |
| DBP mmHg    | (71.00 | 0    | 00   | 0    | 001 | (74-90 | (72-8  | (68-85 | (64-80)    | 1     | (71.00-87. | (70.00- | 0      | (64.00 | 1     | (73.00- | (70.00-  | (68.00- | (65.00-81. | 1     |
|             | -87.25 | (69- | (65- | (64- |     | )      | 8)     | )      |            |       | 00)        | 86.00)  | (68.0  | -80.00 |       | 88.00)  | 87.00)   | 85.00)  | 00)        |       |
|             | )      | 84)  | 81)  | 79)  |     |        |        |        |            |       |            |         | 0-84.  | )      |       |         |          |         |            |       |
|             |        |      |      |      |     |        |        |        |            |       |            |         | 00)    |        |       |         |          |         |            |       |
| Daytime     | 125.50 | 123. | 120  | 119. | <0. | 128.0  | 126.0  | 123.00 | 119.00     | <0.00 | 125.00     | 123.00  | 122.   | 118.0  | <0.00 | 127.00  | 125.00   | 122.00  | 120.00     | <0.00 |
| SBP mmHg    | (116.0 | 00   | .00  | 00   | 001 | 0      | 0      | (113.0 | (110.00-1  | 1     | (115.00-1  | (114.00 | 00     | 0      | 1     | (117.0  | (115.00- | (114.0  | (110.00-12 | 1     |
|             | 0-139. | (11  | (11  | (110 |     | (119.0 | (117.0 | 0-133. | 29.00)     |       | 38.00)     | -135.00 | (113.  | (110.0 |       | 0-139.  | -136.00  | 0-134.  | 9.00)      |       |
|             | 00)    | 3.00 | 1.0  | .00- |     | 0-141. | 0-136. | 00)    |            |       | )          | 25-1    | 0-126. |        | 00)   | )       | 00)      |         |            |       |
|             |        | -13  | 0-1  | 127. |     | 00)    | 00)    |        |            |       |            | 33.0    | 00)    |        |       |         |          |         |            |       |
|             |        | 3.25 | 29.  | 00)  |     |        |        |        |            |       |            | 0)      |        |        |       |         |          |         |            |       |
|             | )      |      | 00)  |      |     |        |        |        |            |       |            |         |        |        |       |         |          |         |            |       |
| Daytime     | 83.00  | 80.0 | 78.  | 77.0 | <0. | 85.00  | 84.00  | 82.00  | 78.00      | <0.00 | 82.00      | 82.00   | 80.5   | 76.00  | <0.00 | 84.00   | 82.00    | 82.00   | 79.00      | <0.00 |
| DBP mmHg    | (74.00 | 0    | 00   | 0    | 001 | (77.00 | (77.00 | (73.00 | (72.00-86. | 1     | (74.00-92. | (74.00- | 0      | (71.00 | 1     | (76.00- | (75.00-  | (74.00- | (72.00-85. | 1     |
|             | -91.00 | (73- | (72. | (71. |     | -92.00 | -91.00 | -89.00 | 50)        |       | 00)        | 89.00)  | (73.0  | -85.00 |       | 91.00)  | 90.00)   | 89.00)  | 00)        |       |
|             | )      | 88.2 | 00-  | 00-8 |     | )      | )      | )      |            |       |            |         | 0-89.  | )      |       |         |          |         |            |       |
|             |        | 5)   | 86.  | 5.00 |     |        |        |        |            |       |            |         | 00)    |        |       |         |          |         |            |       |
|             |        |      | 00)  | )    |     |        |        |        |            |       |            |         |        |        |       |         |          |         |            |       |
| Dippers*    | 11.19  | 17.0 | 18.  | 21.5 | <0. | 10.39  | 12.59  | 18.36  | 20.98      | <0.00 | 14.63      | 15.27   | 17.8   | 18.50  | 0.380 | 13.98   | 15.22    | 16.39   | 18.91      | 0.300 |
| (%)         |        | 2    | 87   | 3    | 001 |        |        |        |            | 1     |            |         | 6      |        |       |         |          |         |            |       |
| Nondippers  | 52.99  | 56.8 | 57.  | 60.5 | 0.2 | 52.21  | 58.77  | 58.94  | 63.76      | 0.017 | 55.68      | 56.16   | 55.7   | 61.27  | 0.379 | 53.19   | 56.96    | 61.05   | 60.59      | 0.127 |
| * (%)       |        | 1    | 41   | 3    | 05  |        |        |        |            |       |            |         | 7      |        |       |         |          |         |            |       |
| Risers* (%) | 35.82  | 26.1 | 23.  | 17.9 | <0. | 37.40  | 28.64  | 22.71  | 15.26      | <0.00 | 29.69      | 28.57   | 26.3   | 20.23  | 0.016 | 32.83   | 27.82    | 22.57   | 20.50      | <0.00 |
|             |        | 8    | 72   | 4    | 001 |        |        |        |            | 1     |            |         | 7      |        |       |         |          |         |            | 1     |

Data are given as n (%) for categorical variables and medians (interquartile range) for continuous variables. BP, blood pressure; DBP, diastolic blood pressure; SBP, systolic blood pressure.

\*Percent of SBP circadian patterns (dippers, nondippers, and risers).

**Table S4. Multivariate logistic regression analysis for nocturnal SBP according to day : night ratio of urinary sodium and potassium excretion rate categories among CKD patients**

| Dependent Variable           | Model | Day : Night Ratio of Urinary Sodium Excretion |                  |                  |                  |         | Day : Night Ratio of Urinary potassium Excretion |                  |                  |                  |         |
|------------------------------|-------|-----------------------------------------------|------------------|------------------|------------------|---------|--------------------------------------------------|------------------|------------------|------------------|---------|
|                              |       | Q1                                            | Q2               | Q3               | Q4               | P Value | Q1                                               | Q2               | Q3               | Q4               | P Value |
|                              |       | ≤ 1.00                                        | 1.01-1.52        | 1.53-2.52        | > 2.52           |         | ≤ 1.44                                           | 1.44-1.9         | 1.95-2.62        | > 2.62           |         |
| <b>High nocturnal BP/ PR</b> |       |                                               |                  |                  |                  |         |                                                  |                  |                  |                  |         |
| SBP                          | 1     | Ref                                           | 0.62 (0.50-0.75) | 0.38 (0.31-0.47) | 0.25 (0.21-0.31) | <0.001  | Ref                                              | 0.78 (0.64-0.96) | 0.59 (0.48-0.72) | 0.39 (0.32-0.47) | <0.001  |
|                              | 2     | Ref                                           |                  | 0.45 (0.37-0.56) | 0.33 (0.27-0.41) | <0.001  | Ref                                              | 0.77 (0.63-0.95) | 0.64 (0.52-0.79) | 0.46 (0.37-0.56) | <0.001  |
|                              | 3     | Ref                                           | 0.66 (0.54-0.81) |                  |                  | <0.001  | Ref                                              | 0.80 (0.64-1.00) | 0.74 (0.59-0.93) | 0.62 (0.50-0.80) | 0.002   |
|                              | 4     | Ref                                           | 0.73 (0.59-0.92) | 0.61 (0.49-0.77) | 0.47 (0.37-0.60) | <0.001  | Ref                                              | 0.78 (0.62-0.98) | 0.72 (0.57-0.90) | 0.62 (0.49-0.78) | 0.001   |
|                              | 5     | Ref                                           | 0.72 (0.58-0.90) | 0.60 (0.48-0.76) | 0.47 (0.37-0.60) | <0.001  | Ref                                              | 0.78 (0.62-0.98) | 0.72 (0.57-0.90) | 0.61 (0.48-0.78) | 0.001   |
|                              |       | Ref                                           | 0.72 (0.58-0.91) | 0.60 (0.48-0.76) | 0.47 (0.37-0.59) |         |                                                  |                  |                  |                  |         |

|                               |   |     |                  |                  |                  |         |                  |                  |                  |                  |       |
|-------------------------------|---|-----|------------------|------------------|------------------|---------|------------------|------------------|------------------|------------------|-------|
| DBP                           | 1 |     | 0.34 (0.27-0.44) | 0.25 (0.20-0.32) | < 0.001          | Ref     | 0.75 (0.59-0.95) | 0.57 (0.45-0.72) | 0.36 (0.29-0.50) | <                |       |
|                               |   | Ref | 0.66 (0.51-0.86) |                  |                  |         |                  |                  |                  | 0.001            |       |
|                               | 2 | Ref | 0.69 (0.56-0.85) | 0.58 (0.47-0.73) | 0.41 (0.32-0.53) | < 0.001 | Ref              | 0.74 (0.58-0.95) | 0.63 (0.49-0.79) | 0.43 (0.34-0.54) | <     |
|                               |   |     |                  |                  |                  |         |                  |                  |                  | 0.001            |       |
|                               | 3 | Ref | 0.81 (0.61-1.06) | 0.52 (0.40-0.68) | 0.45 (0.34-0.59) | < 0.001 | Ref              | 0.76 (0.58-0.99) | 0.72 (0.56-0.93) | 0.55 (0.43-0.71) | <     |
|                               |   |     |                  |                  |                  |         |                  |                  | 0.001            |                  |       |
|                               | 4 | Ref | 0.79 (0.60-1.05) | 0.52 (0.39-0.67) | 0.45 (0.34-0.59) | < 0.001 | Ref              | 0.75 (0.58-0.98) | 0.70 (0.54-0.91) | 0.54 (0.42-0.70) | <     |
|                               |   |     |                  |                  |                  |         |                  |                  |                  | 0.001            |       |
|                               | 5 | Ref | 0.80 (0.60-1.05) | 0.52 (0.40-0.68) | 0.45 (0.34-0.58) | < 0.001 | Ref              | 0.75 (0.57-0.98) | 0.70 (0.54-0.91) | 0.36 (0.41-0.69) | <     |
|                               |   |     |                  |                  |                  |         |                  |                  |                  | 0.001            |       |
| PR                            | 1 | Ref | 0.93 (0.74-1.18) | 0.71 (0.56-0.89) | 0.73 (0.58-0.91) | 0.004   | Ref              | 0.83 (0.65-1.05) | 0.73-0.57-0.92   | 0.49 (0.39-0.61) | <     |
|                               |   |     |                  |                  |                  |         |                  |                  |                  | 0.001            |       |
|                               | 2 | Ref | 0.93 (0.74-1.18) | 0.71 (0.57-0.90) | 0.74 (0.58-0.93) | 0.007   | Ref              | 0.82 (0.65-1.04) | 0.72 (0.57-0.92) | 0.48 (0.8-0.61)  | <     |
|                               |   |     |                  |                  |                  |         |                  |                  |                  | 0.001            |       |
|                               | 3 | Ref | 1.01 (0.79-1.30) | 0.86 (0.67-1.10) | 0.96 (0.75-1.24) | 0.500   | Ref              | 0.87 (0.67-1.11) | 0.78 (0.61-1.01) | 0.58 (0.45-0.74) | <     |
|                               |   |     |                  |                  |                  |         |                  |                  |                  | 0.001            |       |
|                               | 4 | Ref | 1.01 (0.79-1.30) | 0.86 (0.67-1.10) | 0.97 (0.75-1.25) | 0.519   | Ref              | 0.88 (0.68-1.13) | 0.79 (0.62-1.02) | 0.59 (0.46-0.75) | <     |
|                               |   |     |                  |                  |                  |         |                  |                  |                  | 0.001            |       |
|                               | 5 | Ref | 1.02 (0.79-1.30) | 0.86 (0.67-1.10) | 0.97 (0.75-1.25) | 0.513   | Ref              | 0.87 (0.68-1.13) | 0.79 (0.62-1.02) | 0.58 (0.46-0.75) | <     |
|                               |   |     |                  |                  |                  |         |                  |                  |                  | 0.001            |       |
| <b>Nocturnal BP/PR risers</b> |   |     |                  |                  |                  |         |                  |                  |                  |                  |       |
| SBP                           | 1 | Ref |                  | 0.35 (0.27-0.44) | < 0.001          | Ref     | 0.87 (0.70-1.09) | 0.71 (0.57-0.89) | 0.57 (0.45-0.71) | <                |       |
|                               |   |     | 0.66 (0.53-0.81) | 0.52 (0.42-0.65) |                  |         |                  |                  |                  | 0.001            |       |
|                               | 2 | Ref | 0.72 (0.55-0.93) | 0.40 (0.31-0.51) | 0.32 (0.25-0.41) | < 0.001 | Ref              | 0.86 (0.69-1.07) | 0.76 (0.60-0.95) | 0.63 (0.50-0.80) | 0.001 |
|                               |   |     |                  |                  |                  |         |                  |                  |                  |                  |       |
|                               | 3 | Ref | 0.72 (0.57-0.90) | 0.62 (0.49-0.80) | 0.46 (0.34-0.58) | < 0.001 | Ref              | 0.85 (0.67-1.06) | 0.75 (0.59-0.95) | 0.65 (0.51-0.84) | 0.006 |

|     |   |     |                  |                  |                  |        |     |                  |                   |                  |       |
|-----|---|-----|------------------|------------------|------------------|--------|-----|------------------|-------------------|------------------|-------|
|     | 4 | Ref |                  |                  | 0.45 (0.34-0.58) | <0.001 | Ref | 0.84 (0.67-1.06) | 0.744 (0.59-0.94) | 0.65 (0.51-0.84) | 0.006 |
|     |   |     | 0.72 (0.57-0.90) | 0.61 (0.49-0.78) |                  |        |     |                  |                   |                  |       |
|     | 5 | Ref |                  |                  | 0.44 (0.34-0.58) | <0.001 | Ref | 0.84 (0.67-1.06) | 0.75 (0.59-0.94)  | 0.64 (0.50-0.83) |       |
|     |   |     | 0.72 (0.58-0.90) | 0.61 (0.48-0.78) |                  |        |     |                  |                   |                  | 0.005 |
| DBP | 1 | Ref | 0.70 (0.56-0.87) | 0.55 (0.43-0.69) | 0.38 (0.30-0.49) | <0.001 | Ref | 0.69 (0.55-0.87) | 0.66 (0.52-0.83)  | 0.51 (0.40-0.65) | <     |
|     |   |     |                  |                  |                  |        |     |                  |                   |                  | 0.001 |
|     | 2 | Ref | 0.72 (0.58-0.91) | 0.60 (0.47-0.76) | 0.44 (0.34-0.57) | <0.001 | Ref | 0.67 (0.53-0.85) | 0.68 (0.54-0.87)  | 0.55 (0.43-0.71) | <     |
|     |   |     |                  |                  |                  |        |     |                  |                   |                  | 0.001 |
|     | 3 | Ref | 0.75 (0.59-0.94) | 0.63 (0.49-0.81) | 0.47 (0.36-0.62) | <0.001 | Ref | 0.66 (0.52-0.85) | 0.68 (0.53-0.87)  | 0.59 (0.46-0.77) | <     |
|     |   |     |                  |                  |                  |        |     |                  |                   |                  | 0.001 |
|     | 4 | Ref | 0.74 (0.59-0.94) | 0.62 (0.49-0.80) | 0.47 (0.36-0.62) | <0.001 | Ref | 0.66 (0.52-0.84) | 0.68 (0.53-0.87)  | 0.59 (0.46-0.77) | <     |
|     |   |     |                  |                  |                  |        |     |                  |                   |                  | 0.001 |
|     | 5 | Ref | 0.75 (0.59-0.95) | 0.63 (0.49-0.81) | 0.47 (0.35-0.62) | <0.001 | Ref | 0.66 (0.52-0.84) | 0.68 (0.53-0.87)  | 0.58 (0.45-0.76) | <     |
|     |   |     |                  |                  |                  |        |     |                  |                   |                  | 0.001 |
| PR  | 1 | Ref | 0.81 (0.55-1.17) | 0.55 (0.37-0.84) | 0.33 (0.20-0.53) | <0.001 | Ref | 0.66 (0.45-0.96) | 0.43 (0.28-0.66)  | 0.40 (0.26-0.62) | <     |
|     |   |     |                  |                  |                  |        |     |                  |                   |                  | 0.001 |
|     | 2 | Ref | 0.86 (0.59-1.26) | 0.64 (0.42-0.98) | 0.42 (0.25-0.69) | 0.004  | Ref | 0.66 (0.45-0.97) | 0.47 (0.31-0.73)  | 0.48 (0.30-0.74) | 0.001 |
|     |   |     |                  |                  |                  |        |     |                  |                   |                  |       |
|     | 3 | Ref | 0.96 (0.65-1.43) | 0.86 (0.55-1.32) | 0.66 (0.39-1.12) |        | Ref | 0.72 (0.49-1.07) | 0.53 (0.34-0.85)  | 0.71 (0.44-1.15) |       |
|     |   |     |                  |                  |                  | 0.450  |     |                  |                   |                  | 0.050 |
|     | 4 | Ref | 0.99 (0.66-1.46) | 0.87 (0.56-1.36) | 0.65 (0.38-1.11) | 0.427  | Ref | 0.76 (0.51-1.13) | 0.57 (0.36-0.90)  | 0.76 (0.47-1.23) | 0.107 |
|     |   |     |                  |                  |                  |        |     |                  |                   |                  |       |
|     | 5 | Ref | 0.99 (0.66-1.47) | 0.87 (0.56-1.35) | 0.65 (0.38-1.11) | 0.424  | Ref | 0.76 (0.51-1.13) | 0.57 (0.36-0.90)  | 0.76 (0.47-1.23) | 0.106 |

Results are odds ratio (95% CI). M1 indicates unadjusted model; M2, model adjusted for age and sex; M3, the model adjusted for age, sex, eGFR, BMI, tobacco smoking, diabetes, fasting blood glucose, dyslipidemia, CVD, antihypertensive treatment and albuminuria category; M4, model 3 plus 24h Na, 24h K; M5, model 4 plus glucocorticoids. 95% CI, 95% confidence interval. *P* values for trend were calculated by treating quartiles as a continuous variable in each model. BP, blood pressure; DBP, diastolic blood pressure; PR, pulse rate; SBP, systolic blood pressure.
